# Supplementary material for: RTS,S/AS01 malaria vaccine pilot implementation in western Kenya: a qualitative longitudinal study to understand immunisation barriers and optimise uptake
Source: PubMed Central journal article supplement (PMC10657022; doi:10.1186/s12889-023-17194-2), 2023-11-18
Supplement: 12889_2023_17194_MOESM1_ESM.pdf [file 12889_2023_17194_MOESM1_ESM.pdf]

Table S1: The Standards for Reporting Qualitative Research (SRQR) checklist

| <b>Title and abstract</b>                                                                      |                                                                                                                                             | Page number |
|------------------------------------------------------------------------------------------------|---------------------------------------------------------------------------------------------------------------------------------------------|-------------|
| 1. Title                                                                                       | Concise description of the topic of study                                                                                                   | P1          |
| 2. Abstract                                                                                    | Includes background (& aim of study), methods, results, conclusions                                                                         | P2          |
| <b>Introduction</b>                                                                            |                                                                                                                                             |             |
| 3. Problem formulation                                                                         | Description of phenomenon being studied, review of empirical work                                                                           | P4          |
| 4. Purpose or research question                                                                | Purpose of the study/specific objectives                                                                                                    | P4          |
| <b>Methods</b>                                                                                 |                                                                                                                                             |             |
| 5. Qualitative approach and research paradigm                                                  | Qualitative longitudinal study and rationale for study design                                                                               | P5          |
| 6. Researcher characteristics and reflexivity                                                  | Description of researchers, data collectors                                                                                                 | P1, P6-7    |
| 7. Context                                                                                     | Description of study sites and contextual factors                                                                                           | P5-6        |
| 8. Sampling strategy                                                                           | Selection of study sites; caregiver selection for in-depth interviews                                                                       | P5-6        |
| 9. Ethical issues pertaining to human subjects                                                 | Ethics approval from four ethics committees; informed consent from participants                                                             | P14         |
| 10. Data collection methods                                                                    | Description of data collection (in-depth interviews)                                                                                        | P6-7        |
| 11. Data collection instruments and technologies                                               | Details of discussion topic guides                                                                                                          | P6          |
| 12. Units of study                                                                             | Number, type and characteristics of participants                                                                                            | P6, P8, P17 |
| 13. Data processing                                                                            | Management and processing of data                                                                                                           | P7          |
| 14. Data analysis                                                                              | Description of coding and analysis – thematic and trajectory; framework used to support analysis                                            | P7-8        |
| 15. Techniques to enhance trustworthiness                                                      | Description of coding validation discussions and consensus building among the research team                                                 | P7          |
| <b>Results/Findings</b>                                                                        |                                                                                                                                             |             |
| 16. Synthesis and interpretation                                                               | Main findings reported                                                                                                                      | P8-11       |
| 17. Links to empirical data                                                                    | Caregiver narratives                                                                                                                        | Figures 2-5 |
| <b>Discussion</b>                                                                              |                                                                                                                                             |             |
| 18. Integration with prior work, implications, transferability, and contributions to the field | Summary of main findings, situating findings along existing literature; discussion of how these findings contribute to the field of inquiry | P11-13      |
| 19. Limitations                                                                                | Limitations of the study, generalisability of the findings                                                                                  | P13         |
| <b>Other</b>                                                                                   |                                                                                                                                             |             |
| 20. Conflicts of interest                                                                      | None to declare                                                                                                                             | P14         |
| 21. Funding                                                                                    | WHO, GAVI, the Vaccine Alliance, The Global Fund, Unitaid                                                                                   | P14         |
